# Supplementary material
Source: Research Square preprint supplement (doi:10.21203/rs.3.rs-9306622/v1)
Supplement: Supplementary file 1 [file 3f57d3dbcce105d7690183a0.docx]

**APPENDICES**

**Appendix 1: Summary statistics**

|  | **Obs** | **Mean** | **Std. dev.** | **Min** | **Max** |
| --- | --- | --- | --- | --- | --- |
| **Id** | 50 | 3 | 1.428571 | 1 | 5 |
| **Time** | 50 | 2019.5 | 2.901442 | 2015 | 2024 |
| **CO2** | 50 | 163.5955 | 155.0291 | 9.159485 | 502.4578 |
| **Greenhouse** | 50 | 241.3139 | 212.6525 | 19.45764 | 690.4526 |
| **ATMs** | 50 | 54.3318 | 25.11217 | 8.48 | 95.77 |
| **Branch** | 50 | 16.4036 | 13.35436 | 2.812664 | 54.27767 |
| **Loan Volume** | 50 | 33.23205 | 17.76304 | 10.02973 | 75.1544 |

**Appendix 2: Correlation Matrix and VIF Coefficient**

|  | **ATMs** | **Branch** | **Loan Volume** |  | **Variable** | **VIF** | **1/VIF** |
| --- | --- | --- | --- | --- | --- | --- | --- |
| **ATMs** | 1.0000 |  |  | **ATMs** | 1.82 | 0.550617 |
| **Branch** | 0.1188 | 10000 |  |
|  | 0.4114 |  |  | **Loan Volume** | 1.80 | 0.555157 |
| **Loan Volume** | 0.6902 | 0.2532 | 1.0000 | **Branch** | 1.05 | 0.954942 |
|  | 0.0000 | 0.0760 |  | **Mean VIF** | 1.55 |  |
